# Supplementary material for: High-performance Rh@MgO catalysts for complete dehydrogenation of hydrazine borane: a comparative study
Source: Royal Society of Chemistry journal article supplement (doi:10.1039/d4qi02575j), 2024-11-21
Supplement: d4qi02575j1.pdf [file d4qi02575j1.pdf]

SUPPORTING INFORMATION  
for  
High-Performance Rh@MgO Catalysts for Complete  
Dehydrogenation of Hydrazine Borane: A Comparative Study

Ahmet Bulut,<sup>a</sup> Mustafa Erkartal<sup>b,\*</sup>, Mehmet Yurderi,<sup>c, d</sup> Tuba Top,<sup>e</sup> Mehmet Zahmakiran,<sup>a,\*</sup>

<sup>a</sup>*Department of Biotechnology, Faculty of Science, Bartın University, 74100, Bartın, Türkiye*

<sup>b</sup>*Department of Basic Sciences, Department of Basic Sciences, Faculty of Engineering, Architecture and Design, Bartın University, 74100, Bartın, Türkiye*

<sup>c</sup>*Department of Electronics and Automation, Bartın Vocational School, Bartın University, 74100, Bartın, Türkiye*

<sup>d</sup>*Central Research Laboratory, Research & Application Center, Bartın University, 74100, Bartın, Türkiye*

<sup>e</sup>*Department of Chemistry, Faculty of Science, Karabük University, 78000, Karabük, Türkiye*

---

\* \*Corresponding Authors; e-mail: (MZ) [mzahmakiran@bartin.edu.tr](mailto:mzahmakiran@bartin.edu.tr) ; (ME) [merkartal@bartin.edu.tr](mailto:merkartal@bartin.edu.tr)

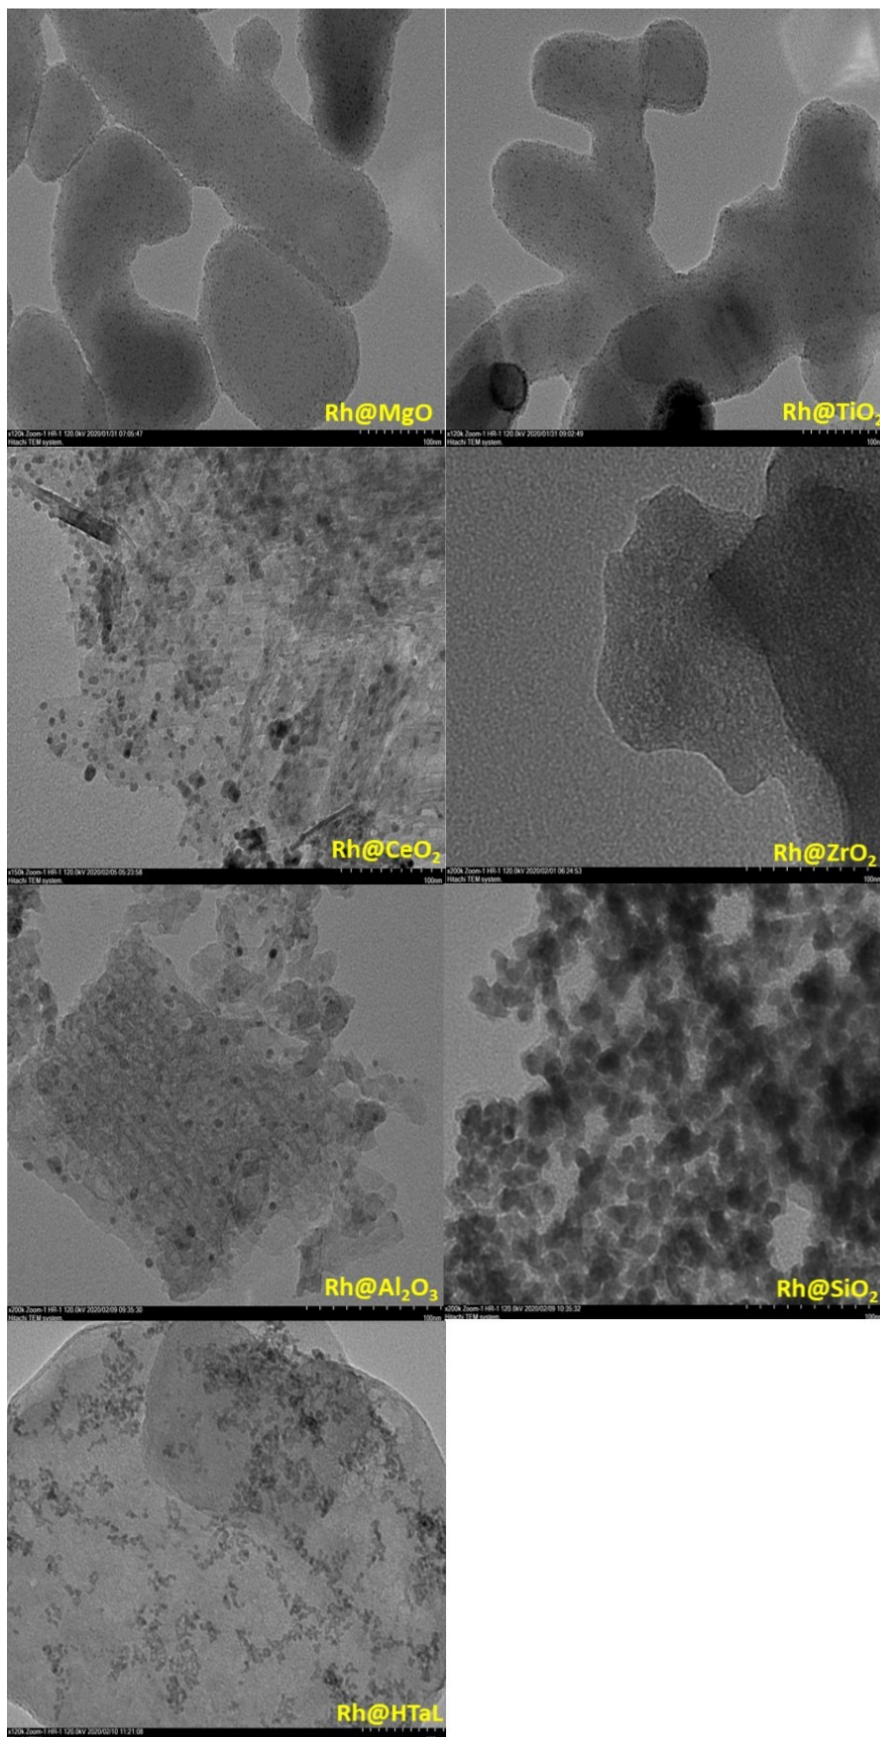

Figure S1. TEM images of monometallic Rh(0) nanoclusters immobilized on different support materials.

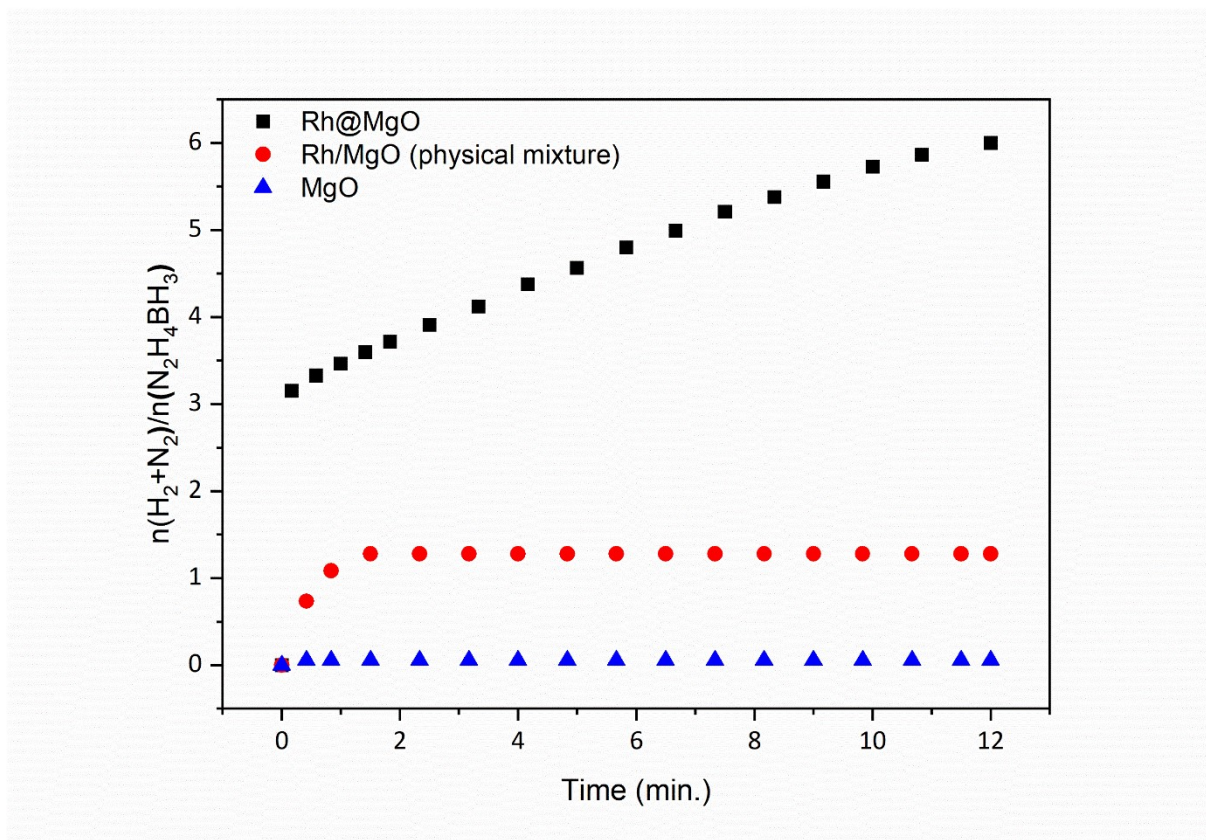

Figure S2. Mole ratio of generated gas ( $H_2 + N_2$ )/HB versus time graph for the Rh@MgO, Rh/MgO (physical mixture) and MgO-catalyzed dehydrogenation of aqueous HB.

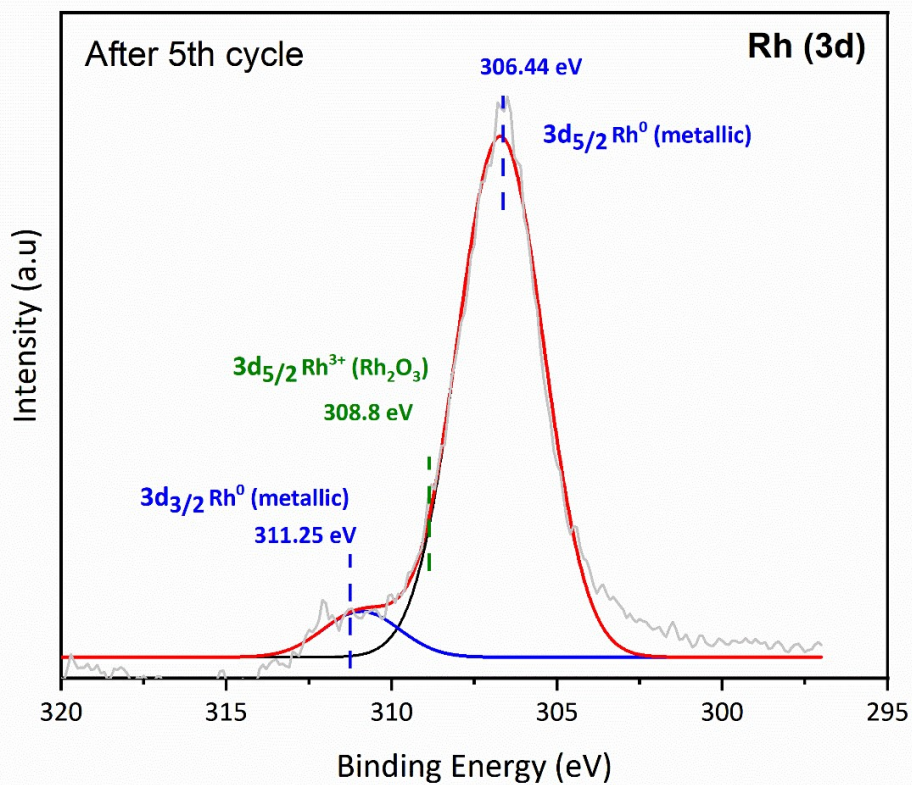

Figure S3. Rh (3d) XPS spectra of Rh@MgO after the 5th reuse cycle, showing the preservation of the metallic Rh structure with minimal shifts, indicating catalyst stability over multiple cycles.

Table S1. Heterogeneous catalysts tested for the complete degradation reaction of hydrazine borane ( $\text{N}_2\text{H}_4\text{BH}_3$ ) in water and capable of conversion.

| No | Catalyst                                                            | Temperature<br>(K) | TOF ( $\text{h}^{-1}$ ) | Ref.      |
|----|---------------------------------------------------------------------|--------------------|-------------------------|-----------|
| 1  | Ni@RhNi/ $\text{Al}_2\text{O}_3$                                    | 323                | 72 $\text{h}^{-1}$      | 1         |
| 2  | $\text{Rh}_{0.8}\text{Ni}_{0.2}$ @ $\text{CeO}_x/\text{rGO}$        | 323                | 667 $\text{h}^{-1}$     | 2         |
| 3  | $\text{Ni}_{0.9}\text{Pt}_{0.1}/\text{Graphene}$                    | 323                | 242 $\text{h}^{-1}$     | 3         |
| 4  | $\text{Ni}_{0.9}\text{Pt}_{0.1}/\text{CeO}_2$                       | 323                | 234 $\text{h}^{-1}$     | 4         |
| 5  | $\text{Ni}_{0.9}\text{Pt}_{0.1}/\text{MIL-101}$                     | 323                | 1515 $\text{h}^{-1}$    | 5         |
| 6  | NiIr/ $\text{Cr}_2\text{O}_3$                                       | 323                | 248 $\text{h}^{-1}$     | 6         |
| 7  | Ni- $\text{MoO}_x/\text{BN}$                                        | 323                | 600 $\text{h}^{-1}$     | 7         |
| 8  | $\text{Ni}_{0.5}\text{Fe}_{0.5}-\text{CeO}_x/\text{MIL-101}$        | 323                | 352 $\text{h}^{-1}$     | 8         |
| 9  | $\text{Cu}_{0.4}\text{Ni}_{0.6}\text{Mo}$                           | 323                | 108 $\text{h}^{-1}$     | 9         |
| 10 | $\text{Ni}_{0.75}\text{Ir}_{0.25}/\text{La}_2\text{O}_2\text{CO}_3$ | 323                | 1250 $\text{h}^{-1}$    | 10        |
| 11 | $\text{Rh}_{0.5}(\text{Mox})_{0.5}$                                 | 323                | 2000 $\text{h}^{-1}$    | 11        |
| 12 | $\text{Ni}_{0.22}$ @ $\text{Ir}_{0.78}/\text{OMS-2}$                | 323                | 2590 $\text{h}^{-1}$    | 12        |
| 13 | Rh@MgO                                                              | 323                | 2005 $\text{h}^{-1}$    | This Work |

### Determination of Average Turnover Frequency (TOF) Values

The activity values in this report are not corrected for the number of exposed surface atoms; that is, the values given are lower limits.

For Rh@MgO catalyst; mol (Rh) = 1.496  $\mu\text{mol}$ , mol (HB) = 1 mmol, Rh@MgO catalyst provides 6 moles equiv. gas generation at  $t = 12$  min.

TOF(average) = moles of product / moles of catalyst  $\times$  time (where 100 % conversion was achieved)

$$\text{TOF(average)} = (6 \times 10^{-3} \text{ mol}) / (1,496 \times 10^{-5} \text{ mol}) \times (12/60 \text{ h})$$

## References

- (1) Li, C.; Dou, Y.; Liu, J.; Chen, Y.; He, S.; Wei, M.; Evans, D. G.; Duan, X. Synthesis of supported Ni@(RhNi-alloy) nanocomposites as an efficient catalyst towards hydrogen generation from N<sub>2</sub>H<sub>4</sub>BH<sub>3</sub>. *Chem Commun* **2013**, 49 (85), 9992-9994, 10.1039/C3CC45697H. DOI: 10.1039/C3CC45697H.
- (2) Zhang, Z.; Lu, Z.-H.; Tan, H.; Chen, X.; Yao, Q. CeO<sub>x</sub>-modified RhNi nanoparticles grown on rGO as highly efficient catalysts for complete hydrogen generation from hydrazine borane and hydrazine. *J Mater Chem A* **2015**, 3 (46), 23520-23529, 10.1039/C5TA06197K. DOI: 10.1039/C5TA06197K.
- (3) Zhang, Z.; Lu, Z.-H.; Chen, X. Ultrafine Ni–Pt Alloy Nanoparticles Grown on Graphene as Highly Efficient Catalyst for Complete Hydrogen Generation from Hydrazine Borane. *ACS Sustainable Chemistry & Engineering* **2015**, 3 (6), 1255-1261. DOI: 10.1021/acssuschemeng.5b00250.
- (4) Wang, H.-L.; Yan, J.-M.; Wang, Z.-L.; O, S.-I.; Jiang, Q. Highly efficient hydrogen generation from hydrous hydrazine over amorphous Ni<sub>0.9</sub>Pt<sub>0.1</sub>/Ce<sub>2</sub>O<sub>3</sub> nanocatalyst at room temperature. *J Mater Chem A* **2013**, 1 (47), 14957-14962, 10.1039/C3TA13259E. DOI: 10.1039/C3TA13259E.
- (5) Zou, H.; Zhang, S.; Hong, X.; Yao, Q.; Luo, Y.; Lu, Z.-H. Immobilization of Ni–Pt nanoparticles on MIL-101/rGO composite for hydrogen evolution from hydrous hydrazine and hydrazine borane. *Journal of Alloys and Compounds* **2020**, 835, 155426. DOI: <https://doi.org/10.1016/j.jallcom.2020.155426>.
- (6) Chen, J.; Lu, Z.-H.; Yao, Q.; Feng, G.; Luo, Y. Complete dehydrogenation of N<sub>2</sub>H<sub>4</sub>BH<sub>3</sub> with NiM-Cr<sub>2</sub>O<sub>3</sub> (M = Pt, Rh, and Ir) hybrid nanoparticles. *J Mater Chem A* **2018**, 6 (42), 20746-20752, 10.1039/C8TA08050J. DOI: 10.1039/C8TA08050J.
- (7) Li, S.-J.; Kang, X.; Wulan, B.-R.; Qu, X.-L.; Zheng, K.; Han, X.-D.; Yan, J.-M. Noble-Metal-Free Ni-MoO Nanoparticles Supported on BN as a Highly Efficient Catalyst toward Complete Decomposition of Hydrazine Borane. *Small Methods* **2018**, 2 (12), 1800250. DOI: <https://doi.org/10.1002/smt.201800250> (accessed 2024/10/07).
- (8) Li, S.-J.; Wang, H.-L.; Wulan, B.-R.; Zhang, X.-b.; Yan, J.-M.; Jiang, Q. Complete Dehydrogenation of N<sub>2</sub>H<sub>4</sub>BH<sub>3</sub> over Noble-Metal-Free Ni<sub>0.5</sub>Fe<sub>0.5</sub>-CeO/MIL-101 with High Activity and 100% H<sub>2</sub> Selectivity. *Advanced Energy Materials* **2018**, 8 (21), 1800625. DOI: <https://doi.org/10.1002/aenm.201800625> (accessed 2024/10/07).
- (9) Yao, Q.; Lu, Z.-H.; Zhang, R.; Zhang, S.; Chen, X.; Jiang, H.-L. A noble-metal-free nanocatalyst for highly efficient and complete hydrogen evolution from N<sub>2</sub>H<sub>4</sub>BH<sub>3</sub>. *J Mater Chem A* **2018**, 6 (10), 4386-4393, 10.1039/C7TA10886A. DOI: 10.1039/C7TA10886A.
- (10) Hong, X.; Yao, Q.; Huang, M.; Du, H.; Lu, Z.-H. Bimetallic NiIr nanoparticles supported on lanthanum oxy-carbonate as highly efficient catalysts for hydrogen evolution from hydrazine borane and hydrazine. *Inorganic Chemistry Frontiers* **2019**, 6 (9), 2271-2278, 10.1039/C9QI00848A. DOI: 10.1039/C9QI00848A.
- (11) Yao, Q.; He, M.; Hong, X.; Chen, X.; Feng, G.; Lu, Z.-H. Hydrogen production via selective dehydrogenation of hydrazine borane and hydrous hydrazine over MoO<sub>x</sub>-promoted Rh catalyst. *Int J Hydrogen Energ* **2019**, 44 (53), 28430-28440. DOI: <https://doi.org/10.1016/j.ijhydene.2019.02.105>.
- (12) Yurderi, M.; Top, T.; Bulut, A.; Kanberoglu, G. S.; Kaya, M.; Zahmakiran, M. Complete Dehydrogenation of Hydrazine Borane on Manganese Oxide Nanorod-Supported Ni@Ir Core–Shell Nanoparticles. *Inorganic Chemistry* **2020**, 59 (14), 9728-9738. DOI: 10.1021/acs.inorgchem.0c00965.
